# Supplementary material for: Lessons Learned from Translating Genome Sequencing to Clinical Routine: Understanding the Accuracy of a Diagnostic Pipeline
Source: MDPI journal article supplement (doi:10.3390/genes15010136), 2024-01-22

## SUPPLEMENTARY TABLES AND FIGURES

**Supplementary Table S1:** Quality parameters

| Data analytic step | Metric                          | Details                                                                                                                                  |
|--------------------|---------------------------------|------------------------------------------------------------------------------------------------------------------------------------------|
| Raw data (FASTQ)   | read count                      | Total number of reads (one cluster in a paired-end experiment generates two reads).                                                      |
|                    | read length                     | Raw read length of a single read before trimming. Comma-separated list of lengths if several.                                            |
|                    | Q20 read percentage             | The percentage of reads with a mean base quality score greater than Q20.                                                                 |
|                    | Q30 base percentage             | The percentage of bases with a minimum quality score of Q30.                                                                             |
|                    | no base call percentage         | The percentage of bases without base call (N).                                                                                           |
|                    | gc content percentage           | The percentage of bases that are called to be G or C.                                                                                    |
|                    | bases sequenced (MB)            | Bases sequenced in total (in megabases).                                                                                                 |
| Mapping (BAM file) | trimmed base percentage         | Percentage of bases that were trimmed during to adapter or quality trimming.                                                             |
|                    | mapped read percentage          | Percentage of reads that could be mapped to the reference genome.                                                                        |
|                    | on-target read percentage       | Percentage of reads that could be mapped to the target region.                                                                           |
|                    | properly-paired read percentage | Percentage of properly paired reads (for paired-end reads only).                                                                         |
|                    | insert size                     | Average insert size (for paired-end reads only).                                                                                         |
|                    | duplicate read percentage       | Percentage of reads removed because they were duplicates (PCR, optical, etc).                                                            |
|                    | target region read depth        | Average sequencing depth in target region.                                                                                               |
|                    | target region 20x percentage    | Percentage of the target region that is covered at least 20-fold.                                                                        |
|                    | bases usable (MB)               | Bases sequenced that are usable for variant calling (in megabases).                                                                      |
|                    | SNV allele frequency deviation  | Percentage of common SNPs that deviate from the expected allele frequency (i.e. 0.0, 0.5 or 1.0 for diploid organisms).                  |
| SNV calling        | clipped base percentage         | Percentage of the bases that are soft-clipped or hand-clipped during mapping.                                                            |
|                    | variant count                   | Total number of variants in the target region.                                                                                           |
|                    | known variants percentage       | Percentage of variants that are known polymorphisms in the dbSNP database.                                                               |
|                    | high-impact variants percentage | Percentage of variants with high impact on the protein, i.e. stop-gain, stop-loss, frameshift, splice-acceptor or splice-donor variants. |
|                    | homozygous variants percentage  | Percentage of variants that are called as homozygous.                                                                                    |
|                    | indel variants percentage       | Percentage of variants that are insertions/deletions.                                                                                    |
| CNV calling        | transition/transversion ratio   | Transition/transversion ratio of single nucleotide variants.                                                                             |
|                    | CNV count                       | Number of high-quality CNVs called by ClinCNV. High-quality means that log-likelihood is bigger or equal to 20.                          |

|            |                              |                                                                                                                                                                                                     |
|------------|------------------------------|-----------------------------------------------------------------------------------------------------------------------------------------------------------------------------------------------------|
|            | coverage profile correlation | Mean correlation between the sample coverage profile and the coverage profiles of the reference                                                                                                     |
|            | number of iterations         | Number of iterations done by ClinCNV when calling CNVs. CNV calling is repeated with increased log-likelihood threshold as long as too many CNVs are detected. Normally only one iteration is done. |
|            | percentage losses            | Percentage of copy-number losses based on high-quality calls on autosomes. High-quality means that log-likelihood is bigger or equal to 20.                                                         |
|            | percentage gains             | Percentage of copy-number gains based on high-quality calls on autosomes. High-quality means that log-likelihood is bigger or equal to 20.                                                          |
| SV calling | SV count                     | Number of structural variants called that PASS filters.                                                                                                                                             |
|            | percentage deletions         | Percentage of structural variants that PASS filters and are deletions.                                                                                                                              |
|            | percentage duplications      | Percentage of structural variants that PASS filters and are duplications.                                                                                                                           |
|            | percentage insertions        | Percentage of structural variants that PASS filters and are insertions.                                                                                                                             |
|            | percentage inversions        | Percentage of structural variants that PASS filters and are inversions.                                                                                                                             |
|            | percentage breakends         | Percentage of structural variants that PASS filters and are breakends.                                                                                                                              |

**Supplementary Table S2:** Disease group distribution and report outcome of GS samples

| Disease groups                                              | Exome       |              |                |                | Genome      |              |                |                |
|-------------------------------------------------------------|-------------|--------------|----------------|----------------|-------------|--------------|----------------|----------------|
|                                                             | Total       | Solved cases | Cases with VUS | Unsolved cases | Total       | Solved cases | Cases with VUS | Unsolved cases |
| Diseases of the nervous system                              | <b>107</b>  | 25.23%       | 28.97%         | 45.79%         | <b>691</b>  | 15.20%       | 29.38%         | 55.43%         |
| Mental, behavioural or neurodevelopmental disorders         | <b>522</b>  | 28.16%       | 30.84%         | 41%            | <b>164</b>  | 21.95%       | 40.24%         | 37.80%         |
| Neoplasms                                                   | <b>37</b>   | 18.92%       | 2.7%           | 78.38%         | <b>492</b>  | 13.62%       | 14.02%         | 72.36%         |
| Diseases of the visual system                               | <b>1</b>    | 100%         | 0%             | 0%             | <b>334</b>  | 44.61%       | 26.95%         | 28.44%         |
| Endocrine, nutritional or metabolic diseases                | <b>110</b>  | 21.82%       | 15.45%         | 62.73%         | <b>44</b>   | 15.91%       | 25%            | 59.09%         |
| Diseases of the musculoskeletal system or connective tissue | <b>66</b>   | 16.67%       | 39.39%         | 43.94%         | <b>54</b>   | 18.52%       | 24.07%         | 57.41%         |
| Diseases of the ear or mastoid process                      | <b>0</b>    | 0%           | 0%             | 0%             | <b>72</b>   | 26.39%       | 45.83%         | 27.78%         |
| Developmental anomalies                                     | <b>58</b>   | 37.93%       | 5.17%          | 56.90%         | <b>12</b>   | 25%          | 16.67%         | 58.33%         |
| Diseases of the immune system                               | <b>60</b>   | 13.33%       | 28.33%         | 58.33%         | <b>9</b>    | 11.11%       | 22.22%         | 66.67%         |
| Diseases of the circulatory system                          | <b>24</b>   | 12.50%       | 54.17%         | 33.33%         | <b>33</b>   | 9.09%        | 30.30%         | 60.61%         |
| Diseases of the genitourinary system                        | <b>3</b>    | 0%           | 33.33%         | 66.67%         | <b>43</b>   | 20.93%       | 16.28%         | 62.79%         |
| Diseases of the blood or blood-forming organs               | <b>11</b>   | 27.27%       | 36.36%         | 36.36%         | <b>15</b>   | 13.33%       | 33.33%         | 53.33%         |
| Other diseases                                              | <b>17</b>   | 41.18%       | 29.41%         | 29.41%         | <b>14</b>   | 35.71%       | 21.43%         | 42.86%         |
| Sum                                                         | <b>1016</b> | 25.59%       | 27.46%         | 46.95%         | <b>1977</b> | 21.04%       | 26%            | 52.96%         |

**Supplementary Table S3:** Ancestry distribution of diagnostic cases from index samples sequenced in 2022

| Ancestry        | Exome           | Genome           |
|-----------------|-----------------|------------------|
| EUR             | 866<br>(85.24%) | 1844<br>(93.27%) |
| ADMIXED/UNKNOWN | 105<br>(10.33%) | 84<br>(4.25%)    |
| EAS             | 4<br>(0.39%)    | 12<br>(0.61%)    |
| AFR             | 12<br>(1.18%)   | 14<br>(0.71%)    |
| SAS             | 29<br>(2.85%)   | 23<br>(1.16%)    |
| Total           | 1016            | 1977             |

**Supplementary Table S4:** List of specific diagnoses solved by ES and GS in 2022

| Disease groups                                      | Genes of specific diagnoses solved by ES                                                                                                                                                                                                                                                                                                                                                                                                                                                                                                                                                                                                                                                                                                                                        | Genes of specific diagnoses solved by GS                                                                                                                                                                                                                                                                                                                                                                                                                                                  |
|-----------------------------------------------------|---------------------------------------------------------------------------------------------------------------------------------------------------------------------------------------------------------------------------------------------------------------------------------------------------------------------------------------------------------------------------------------------------------------------------------------------------------------------------------------------------------------------------------------------------------------------------------------------------------------------------------------------------------------------------------------------------------------------------------------------------------------------------------|-------------------------------------------------------------------------------------------------------------------------------------------------------------------------------------------------------------------------------------------------------------------------------------------------------------------------------------------------------------------------------------------------------------------------------------------------------------------------------------------|
| Diseases of the nervous system                      | <i>ABCD1, CACNA1A, CDKL5, COL4A1, CTNS, DAGLA, HTT (RE), IRF2BPL, MFN2, MPZ, MT-TK, NF2, PCDH19, POLG, POLG2, PRRT2, SPAST, SPG11, SPG7, TSC2, WARS2</i>                                                                                                                                                                                                                                                                                                                                                                                                                                                                                                                                                                                                                        | <i>ABCD1, ACTB, ADAR, ADCY5, AFG3L2, AMPD1, ANG, ANO10, AP5Z1, AR (RE), ATP1A3, ATXN2 (RE), ATXN3, BRPF1, C9orf72 (RE), CACNA1A, CNGB1, CYP7B1, FARS2, FLNC, GBE1, GFAP, GJB1, GJC2, GLA, GRN, HADHA, HTRA1, HTT (RE), JAG1, KRIT1, LAMB1, MFN2, MME, MT-ATP6, NEU1, NFKB2, NIPA1, NKX2-1, NOTCH3, OPTN, PAH, PIEZO2, POLR3A, PRKCG, PRNP, PSEN1, PSEN2, REEP1, RORA, SACS, SETX, SLC20A2, SLC2A1, SOD1, SPAST, SPG7, SPG7, STUB1, TARDBP, TBK1, TBP (RE), TTBK2, TUBB3, TWNK, UCHL1,</i> |
| Mental. behavioural or neurodevelopmental disorders | <i>ACAN, ACTB, ADNP, AFG2B, ALDH1A3, ALDH4A1, AMPD1, ANKRD11, ATAD3A, ATP1A2, ATP1A3, BBS2, BCL11A, CAMTA1, CCND2, CHD3, CHD7, CHD8, CNGB3, CNKSR2, CREBBP, CTNNB1, CUL7, DDX3X, EBF3, ECM1, EEF1A2, EHMT1, EHMT1, EIF3F, FANCD2, FBXO11, FGFR3, FOXP1, GRIN2A, GRIN2B, HEXA, HSD17B10, IFIH1, IQSEC2, ITPR1, KAT6B, KCNB1, KCNQ2, KMT2A, KMT2E, KMT5B, LAMB1, MAP1B, MECP2, MED12, MED13, MTFMT, MYT1L, NALCN, NEXMIF, NF1, NFIB, OCA2, ORC6, PAH, PCDHGC4, PHF6, PHKA2, PIGA, POLR3B, POMGNT1, POMT1, UCK1, PPP1CB, PRR12, PTPN11, QRIH1, RAI1, RARS1, RNASET2, RPS6KA3, SCN11A, SCN1A, SELENON, SETD5, SGSH, SHANK1, SHANK3, SLC38A8, SMARCA2, SOX5, SOX9, SRCAP, TCF12, TCF20, TCF4, THRA, TLK2, TNRC6B, TRPS1, TSEN54, TUBA1A, TUBB2A, UBR7, WAC, WDR37, YARS1, ZNF148</i> | <i>ABCA12, AP2S1, AUTS2, BBS1, BBS9, BCL11B, CACNA1C, CHST14, COL1A1, COL4A5, FBN1, JARID2, KCND3, KCNJ1, KMT2D, MECP2, MORC2, NR2F1, NRCAM, PCDH12, PLP1, RNU4ATAC, SETD5, TNRC6B, TUBB, FMR1 (RE)</i>                                                                                                                                                                                                                                                                                   |
| Neoplasms                                           | <i>ATM, BRCA1, MUTYH, PTEN, SCN8A, TP53</i>                                                                                                                                                                                                                                                                                                                                                                                                                                                                                                                                                                                                                                                                                                                                     | <i>APC, ATM, BARD1, BRCA1, BRCA2, CHEK2, HOXB13, MLH1, MSH2, MSH6, NF1, PALB2, RAD51C, RAD51C, RAD51D, SDHB, TP53, TSC1</i>                                                                                                                                                                                                                                                                                                                                                               |
| Diseases of the visual system                       | <i>USH2A</i>                                                                                                                                                                                                                                                                                                                                                                                                                                                                                                                                                                                                                                                                                                                                                                    | <i>ABCA4, ADGRV1, AIPL1, AP5Z1, ATAD3A, BBS1, BBS1, BBS10, BEST1, BEST1, CDH23, CEP290, CEP78, CERKL, CHM, CLRN1, CNGA3, CNGB3, CYP1B1, ELOVL4, EYS, GUCA1A, KCNV2, MAK, MERTK, MT-ATP6, MT-</i>                                                                                                                                                                                                                                                                                          |

|                                                             |                                                                                                                                                                                              |                                                                                                                                                                                                                             |
|-------------------------------------------------------------|----------------------------------------------------------------------------------------------------------------------------------------------------------------------------------------------|-----------------------------------------------------------------------------------------------------------------------------------------------------------------------------------------------------------------------------|
|                                                             |                                                                                                                                                                                              | <i>ND4, MT-ND6, MYO7A, NR2E3, OPA1, OPA3, OTX2, PAX6, PDE6A, PDE6B, PITX3, PMM2, PROM1, PRPF31, PRPF8, PRPH2, PRPH2, RHO, RP1, RP1L1, RP2, RPGR, RPGR, RS1, SPATA7, TMEM126A, TUBB4B, TULP1, USH1C, USH2A, VPS13B, WFS1</i> |
| Endocrine. nutritional or metabolic diseases                | <i>MT-TL1, NLRP3, RASA1, HBB, ATP7B, SLC2A2, AVPR2, TNFAIP3, ATM, NF1, UGT1A1, BTK, ARSA, SLC19A3, CFTR, ADAR, MT-ATP6, YARS1, CLCN1, CYP11A1, HFE, LDLR, TG PAX8, SLC12A3, BCS1L, SNX14</i> |                                                                                                                                                                                                                             |
| Diseases of the musculoskeletal system or connective tissue | <i>AR (RE), CLCN1, COL2A1, COL6A3, FBN1, HNF1A, TTN, ZC4H2</i>                                                                                                                               | <i>AHCY, ANO5, CFBF, CLCN1, COL2A1, FBN1, HPDL, LMNA, NF1, PHEX</i>                                                                                                                                                         |
| Diseases of the ear or mastoid process                      |                                                                                                                                                                                              | <i>GJB2, MT-CO1, MYO6, MYO7A, PTPRQ, SLC26A4, STRC, TECTA, TMIE</i>                                                                                                                                                         |
| Developmental anomalies                                     | <i>ANK1, CEP290, CHD7, COL1A1, GBE1, GREB1L, IRF6, KMT2D, LPAR6, RB1, MYRF, NIPBL, PIEZO1, WNT10A</i>                                                                                        | <i>CHST14, LDLR, RBM8A</i>                                                                                                                                                                                                  |
| Diseases of the immune system                               | <i>CYBB, ELANE, MEFV, NLRP3, RAG1</i>                                                                                                                                                        | <i>BTK</i>                                                                                                                                                                                                                  |
| Diseases of the circulatory system                          | <i>MYBPC3, CHD7, KCNQ1</i>                                                                                                                                                                   | <i>DSP, TPM1, TTN</i>                                                                                                                                                                                                       |
| Diseases of the genitourinary system                        |                                                                                                                                                                                              | <i>AR, HSD17B3, SRD5A2, UMOD</i>                                                                                                                                                                                            |
| Diseases of the blood or blood-forming organs               | <i>ABCC6, ADAMTS13, CFTR</i>                                                                                                                                                                 | <i>ENG, MYH9</i>                                                                                                                                                                                                            |
| Other diseases                                              | <i>ACTG2, CCDC103, NF1, PLG</i>                                                                                                                                                              | <i>KRIT1, NF1, NLRP3</i>                                                                                                                                                                                                    |

Genes affected by disease-causal small variants and repeat expansions (RE) sorted by disease groups.

**Supplementary Table S5:** Repeat motives/regions screened with Expansion Hunter tool

| Chromosome | Position Start | Position End | Gene            | Repeat unit |
|------------|----------------|--------------|-----------------|-------------|
| chr1       | 149390802      | 149390841    | <i>NOTCH2NL</i> | GGC         |
| chr2       | 190880872      | 190880920    | <i>GLS</i>      | GCA         |
| chr3       | 63912684       | 63912714     | <i>ATXN7</i>    | GCA         |
| chr3       | 63912714       | 63912726     | <i>ATXN7</i>    | GCC         |
| chr3       | 129172576      | 129172656    | <i>CNBP</i>     | CAGG        |
| chr3       | 129172656      | 129172696    | <i>CNBP</i>     | CAGA        |
| chr3       | 129172696      | 129172732    | <i>CNBP</i>     | CA          |
| chr4       | 3074876        | 3074933      | <i>HTT</i>      | CAG         |
| chr4       | 3074939        | 3074966      | <i>HTT</i>      | CCG         |
| chr4       | 39348424       | 39348479     | <i>RFC1</i>     | AARRG       |
| chr4       | 41745972       | 41746032     | <i>PHOX2B</i>   | GCN         |
| chr5       | 146878727      | 146878757    | <i>PPP2R2B</i>  | GCT         |
| chr6       | 16327633       | 16327723     | <i>ATXN1</i>    | TGC         |
| chr6       | 170561906      | 170562017    | <i>TBP</i>      | GCA         |
| chr9       | 27573528       | 27573546     | <i>C9ORF72</i>  | GGCCCC      |
| chr9       | 69037261       | 69037286     | <i>FXN</i>      | A           |
| chr9       | 69037286       | 69037304     | <i>FXN</i>      | GAA         |
| chr11      | 119206289      | 119206322    | <i>CBL</i>      | CGG         |
| chr12      | 6936716        | 6936773      | <i>ATN1</i>     | CAG         |
| chr12      | 50505001       | 50505022     | <i>DIP2B</i>    | GGC         |
| chr12      | 111598949      | 111599018    | <i>ATXN2</i>    | GCT         |
| chr13      | 70139353       | 70139383     | <i>ATXN8OS</i>  | CTA         |
| chr13      | 70139383       | 70139428     | <i>ATXN8OS</i>  | CTG         |
| chr13      | 102161576      | 102161726    | <i>FGF14</i>    | GAA         |
| chr14      | 23321472       | 23321490     | <i>PABPN1</i>   | GCG         |
| chr14      | 92071009       | 92071042     | <i>ATXN3</i>    | GCT         |
| chr15      | 22786677       | 22786701     | <i>NIPA1</i>    | GCG         |
| chr16      | 87604287       | 87604329     | <i>JPH3</i>     | CTG         |
| chr18      | 55586155       | 55586227     | <i>TCF4</i>     | CAG         |
| chr19      | 13207858       | 13207897     | <i>CACNA1A</i>  | CTG         |
| chr19      | 14496041       | 14496074     | <i>GIPCI</i>    | CCG         |
| chr19      | 45770204       | 45770264     | <i>DMPK</i>     | CAG         |
| chr20      | 2652733        | 2652757      | <i>NOP56</i>    | GGCCTG      |

|       |           |           |               |              |
|-------|-----------|-----------|---------------|--------------|
| chr20 | 2652757   | 2652775   | <i>NOP56</i>  | CGCCTG       |
| chr21 | 43776443  | 43776479  | <i>CSTB</i>   | CGCGGGGCGGGG |
| chr22 | 45795354  | 45795424  | <i>ATXN10</i> | ATTCT        |
| chrX  | 67545316  | 67545385  | <i>AR</i>     | GCA          |
| chrX  | 147912050 | 147912110 | <i>FMR1</i>   | CGG          |
| chrX  | 148500631 | 148500691 | <i>AFF2</i>   | GCC          |

**Supplementary Figure S1:** Age distribution of index samples in 2022

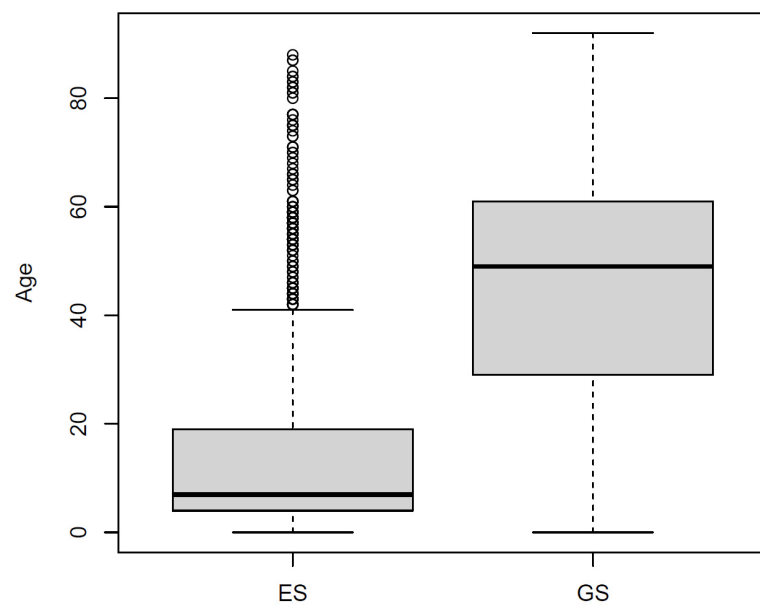

Supplement: s1 [file s1]
